# Supplementary material for: Prolonged usage of fosaprepitant for prevention of delayed chemotherapy-induced nausea and vomiting(CINV) in patients receiving highly emetogenic chemotherapy
Source: Springer Nature journal article supplement (doi:10.1186/s12885-023-11070-3), 2023-07-01

Supplementary figure 1. CONSORT diagram.

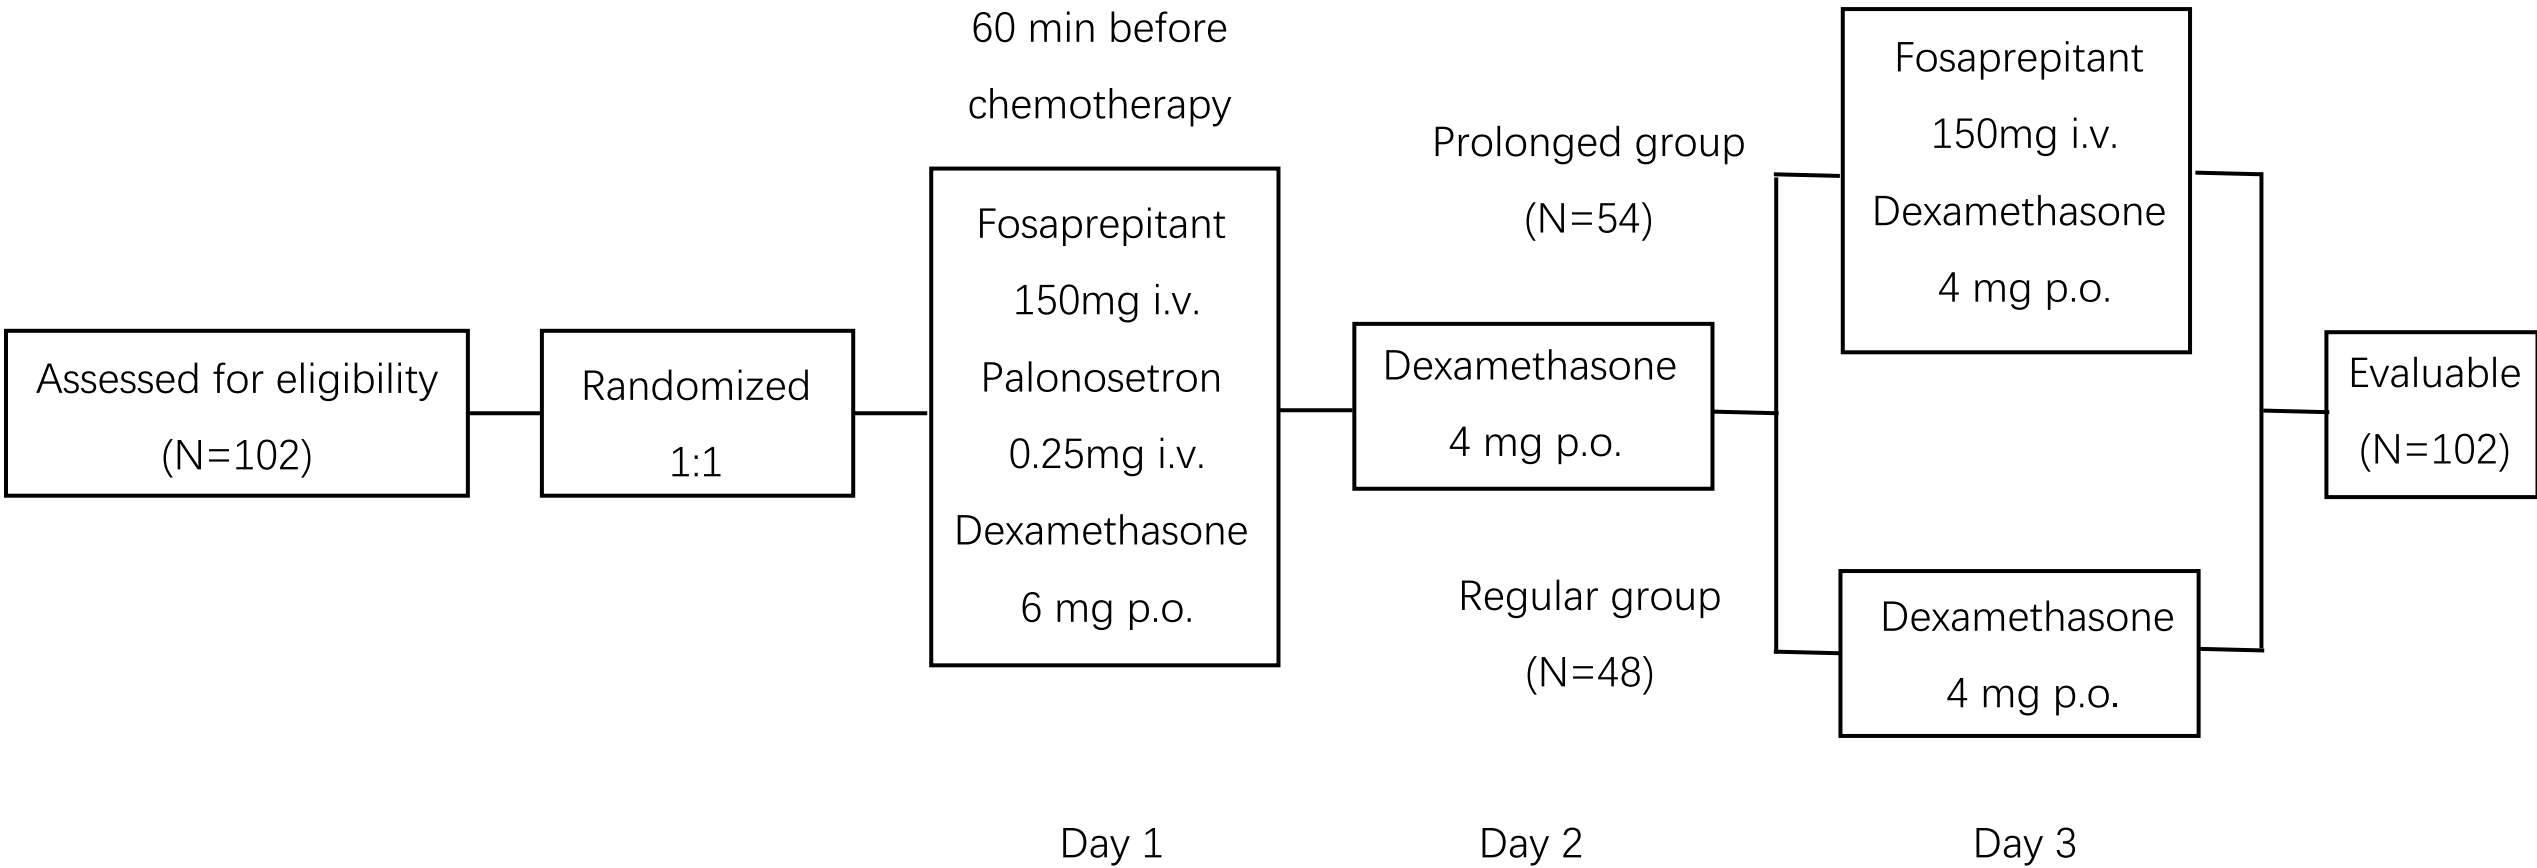

Supplement: MOESM1 [file 25564266]
