# Supplementary material for: Prolonged usage of fosaprepitant for prevention of delayed chemotherapy-induced nausea and vomiting(CINV) in patients receiving highly emetogenic chemotherapy
Source: Springer Nature journal article supplement (doi:10.1186/s12885-023-11070-3), 2023-07-01
Supplement: MOESM2 [file 25564266]

## Supplementary figure 2. Patient dairy

|          | D1 | D2 | D3 | D4 | D5 | D6 | D7 | D8 | D9 | D10 | D11 | D12 | D13 | D14 |
|----------|----|----|----|----|----|----|----|----|----|-----|-----|-----|-----|-----|
| Nausea   |    |    |    |    |    |    |    |    |    |     |     |     |     |     |
| Vomiting |    |    |    |    |    |    |    |    |    |     |     |     |     |     |

Please fill in the table with the appropriate number in reference to the explanation.

- Nausea

Please choose the poorest degree of nausea over the course of 1 day.

no symptoms                      can drink and eat a little                      can drink but cannot eat                      can neither eat

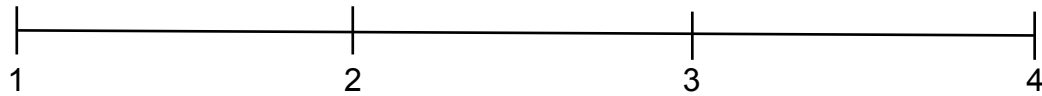

- Vomiting

Please count the number of times that vomiting continued for more than 5 minutes over the course of 1 day.

1. No vomiting occurred
2. 1-2 times
3. 3-5 times
4. More than 6 times
