# Supplementary material for: Prolonged usage of fosaprepitant for prevention of delayed chemotherapy-induced nausea and vomiting(CINV) in patients receiving highly emetogenic chemotherapy
Source: Springer Nature journal article supplement (doi:10.1186/s12885-023-11070-3), 2023-07-01
Supplement: MOESM3 [file 25564266]

Supplementary figure 2. Percentage of patients experiencing nausea and vomiting.

A

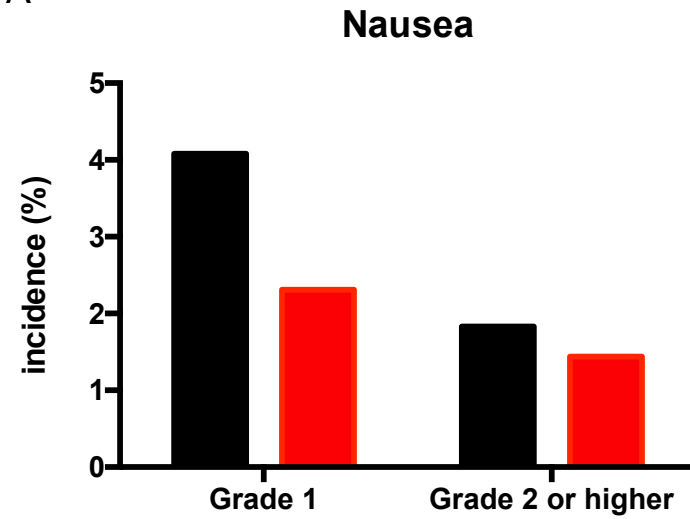

Persistent phase

B

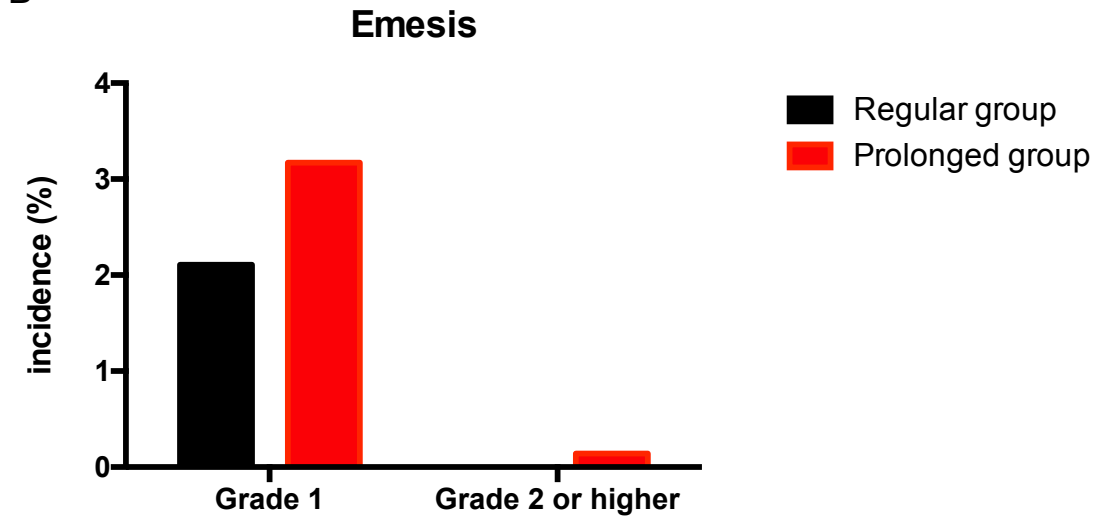

Persistent phase
